# Supplementary material for: Deep eutectic solvent-based manganese molybdate nanosheets for sensitive and simultaneous detection of human lethal compounds: comparing the electrochemical performances of M-molybdate (M = Mg, Fe, and Mn) electrocatalysts
Source: Royal Society of Chemistry journal article supplement (doi:10.1039/d0nr05533f), 2020-01-01
Supplement: d0nr05533f1.pdf [file d0nr05533f1.pdf]

### **Supporting information**

#### **Deep eutectic solvent-based manganese molybdate nanosheets for sensitive and simultaneous detection of human lethal compounds: Comparing the electrochemical performances of M-molybdate (M= Mg, Fe, and Mn) electrocatalysts**

Jeena N. Baby,<sup>a, ‡</sup> Balasubramanian Sriram,<sup>b, ‡</sup> Sea-Fue Wang,<sup>b,\*</sup> Mary George,<sup>a,\*</sup> Mani Govindasamy,<sup>b</sup> Xavier Benadict Joseph,<sup>b</sup>

<sup>a</sup>Department of Chemistry, Stella Maris College, Affiliated to the University of Madras, Chennai-600 086, Tamil Nadu, India.

<sup>b</sup>Department of Materials and Mineral Resources Engineering, National Taipei University of Technology, No. 1, Sec. 3, Chung-Hsiao East Rd., Taipei 106, Taiwan.

#### **Corresponding Authors**

Sea-Fue Wang – Email: [sfwang@ntut.edu.tw](mailto:sfwang@ntut.edu.tw).

Mary George – Email: [marygeorge@stellamariscollege.edu.in](mailto:marygeorge@stellamariscollege.edu.in).

## Chemicals and Reagents

All the chemicals used in the study are of analytical grade and are received from Sigma-Aldrich and Merck. Ultrapure fresh water is obtained from a millipore water purification system (Milli-Q, specific resistivity  $>18\text{ M}\Omega\text{cm}$ , S.A.; Molsheim, France) and is used in all the experiments. Sodium phosphate dibasic and sodium dihydrogen phosphate ( $\text{Na}_2\text{HPO}_4$  and  $\text{NaH}_2\text{PO}_4$ ) are utilized to prepare  $0.05\text{ M}$  (pH 7) PB (phosphate buffer). All the electrochemical experiments are carried out using  $0.05\text{ M}$  PB (pH 7) as the supporting electrolyte.

## Fabrication of Modified Electrodes.

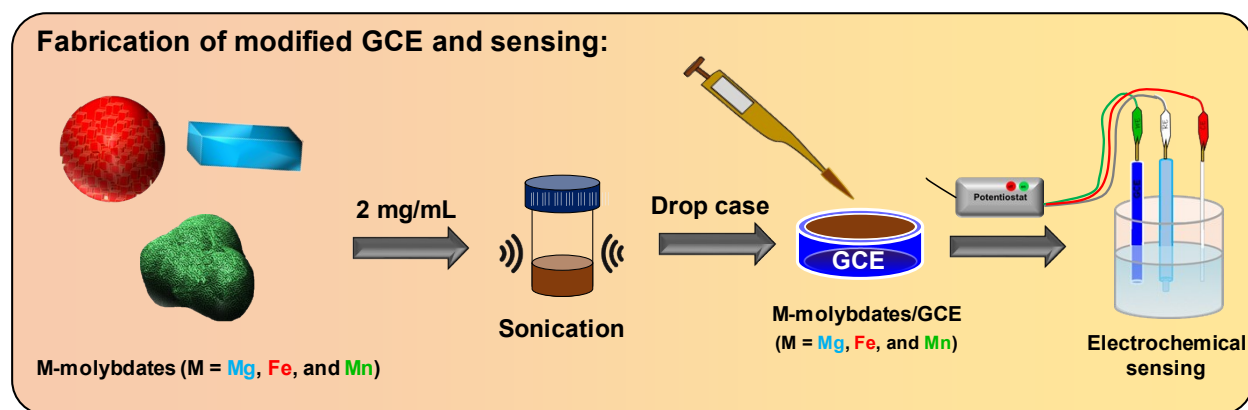

**Scheme S1.** Fabrication of M-molybdate ( $M = \text{Mg}, \text{Fe}$  and  $\text{Mn}$ ) modified electrodes and sensing of HQ,  $\text{Hg}^{2+}$  and  $\text{NO}_2^-$

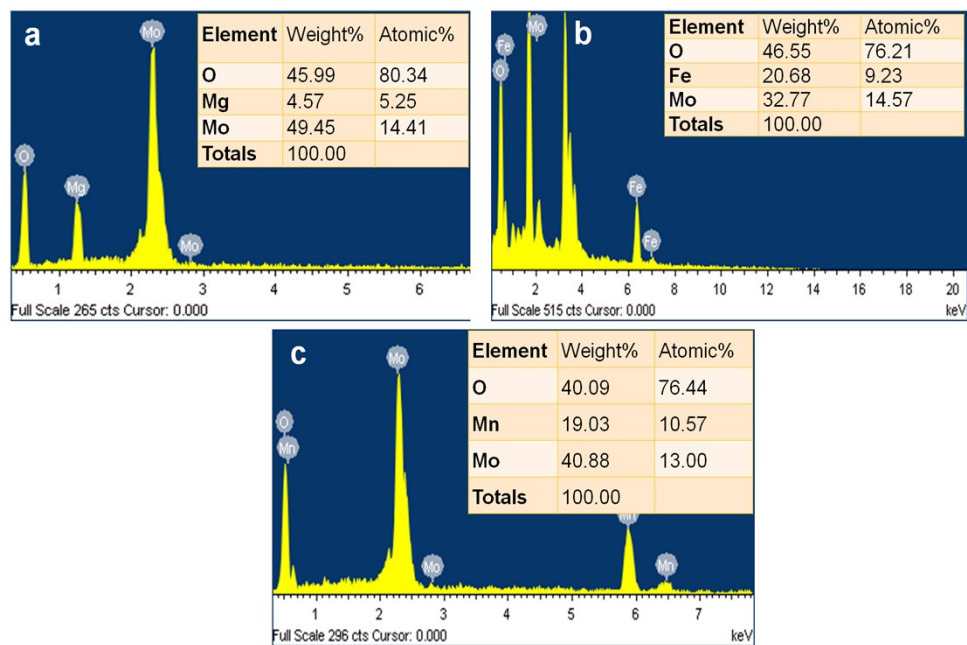

**Fig. S1.** EDS of (a) MgMoO<sub>4</sub> NRs (b) Fe<sub>2</sub>(MoO<sub>4</sub>)<sub>3</sub> Ys and (c) MnMoO<sub>4</sub> BC.

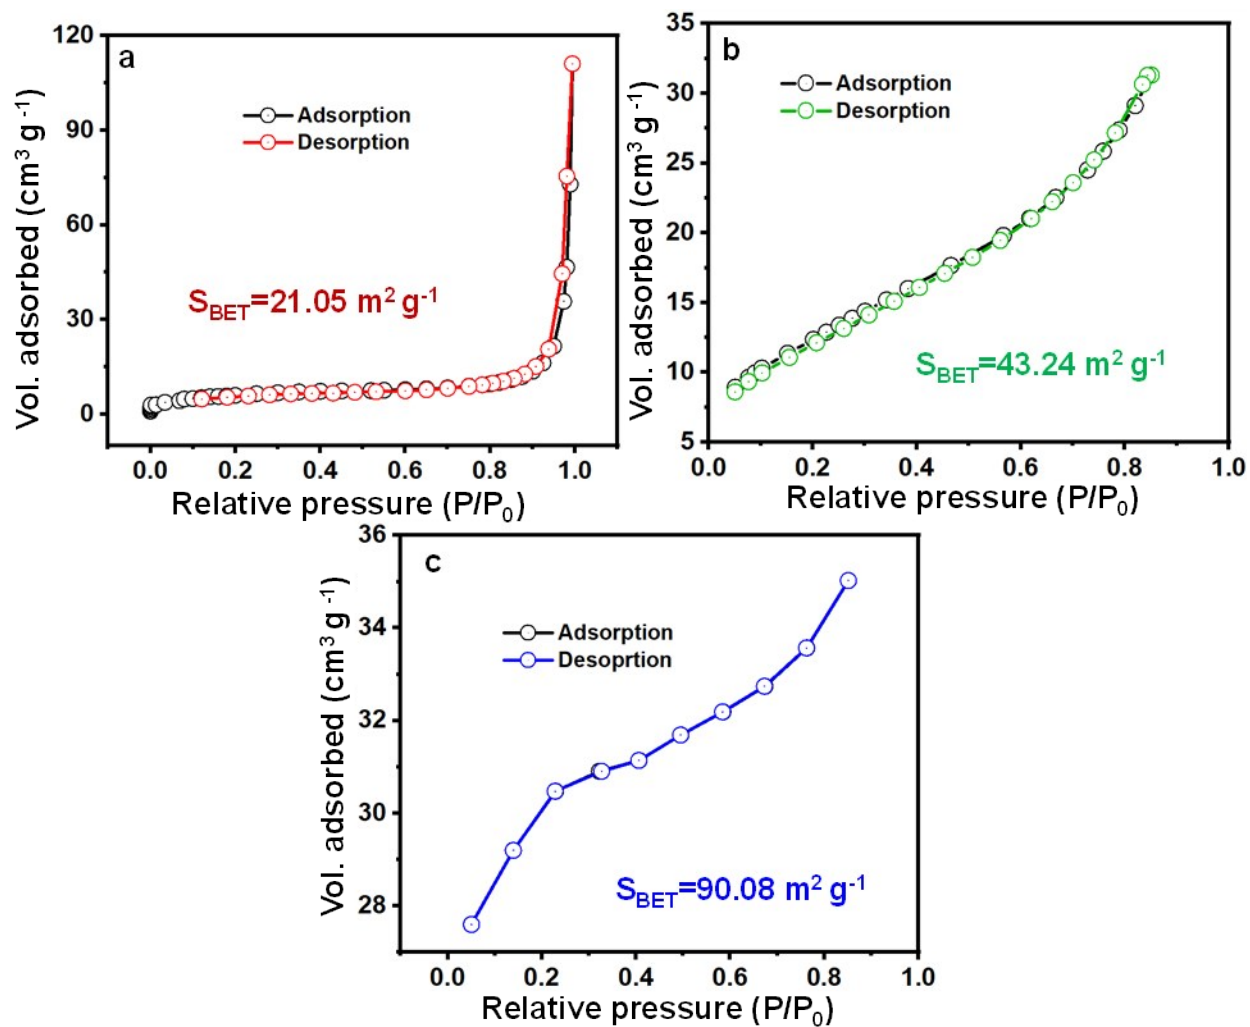

Fig. S2. BET isotherms of (a) MgMoO<sub>4</sub> (b) Fe<sub>2</sub>(MoO<sub>4</sub>)<sub>3</sub> and (c) MnMoO<sub>4</sub>.

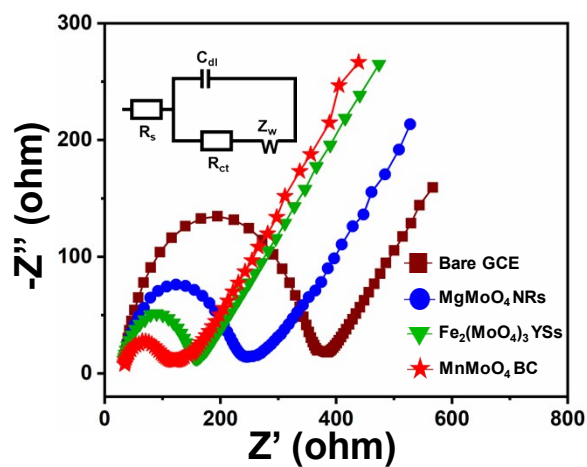

**Fig. S3.** Nyquist plot of various electrodes: bare GCE, MgMoO<sub>4</sub> NRs/GCE, Fe<sub>2</sub>(MoO<sub>4</sub>)<sub>3</sub> YSSs/GCE and MnMoO<sub>4</sub> BC/GCE; inset: diagram of Randles equivalent circuit model.

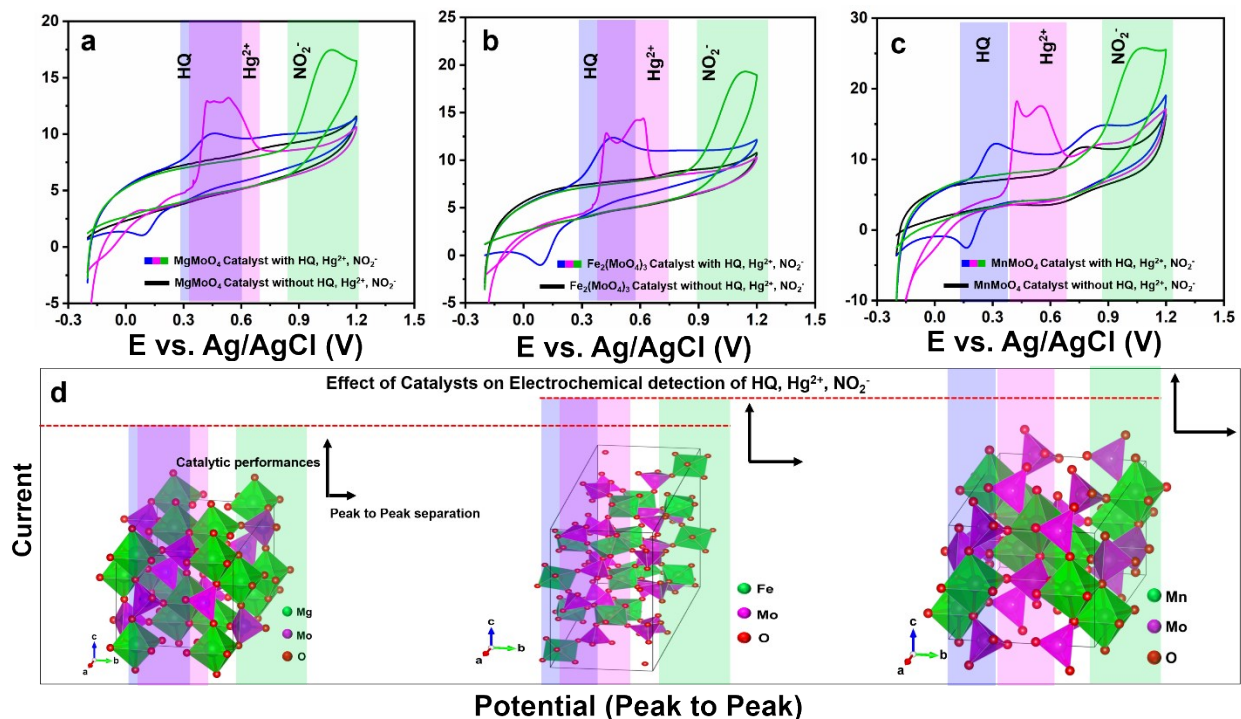

**Fig.S4.** CV profiles of background, unmodified and modified MgMoO<sub>4</sub> NRs (a), Fe<sub>2</sub>(MoO<sub>4</sub>)<sub>3</sub> YSSs (b), and MnMoO<sub>4</sub> BC (c) electrodes towards 100 μM of HQ, Hg<sup>2+</sup> and NO<sub>2</sub><sup>-</sup>. All measurements were recorded in electrolyte: 0.05 M PB (pH 7.0) at a scan rate of 50 mV s<sup>-1</sup>. (d), Crystal structures of MgMoO<sub>4</sub> (a), Fe<sub>2</sub>(MoO<sub>4</sub>)<sub>3</sub> (b), and MnMoO<sub>4</sub> with catalytic performances towards Electrochemical detection of HQ, Hg<sup>2+</sup> and NO<sub>2</sub><sup>-</sup>.

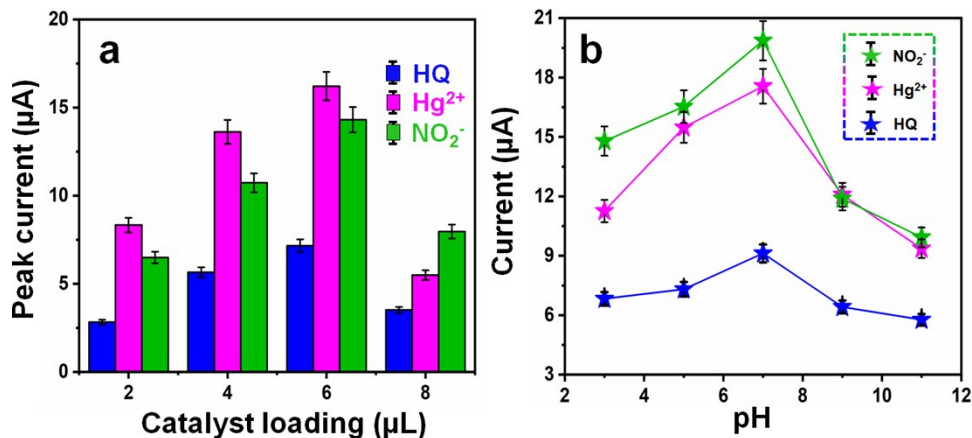

**Fig. S5. (a)** Effect of catalyst loading on GCEs ( $\mu\text{L}$ ) vs. relative peak current in presence of HQ,  $\text{Hg}^{2+}$  and  $\text{NO}_2^-$ . **(b)** Plot of  $\text{MnMoO}_4$  BC/GCE obtained in supporting electrolyte at different pH containing  $100 \mu\text{M}$  HQ,  $\text{Hg}^{2+}$  and  $\text{NO}_2^-$  (plot between current vs pH).

### **Real sample preparation**

Face cream was obtained from local shop market. Tuna fish & Salami are brought from Zhnogshan fish market, Taipei, Taiwan. Certain amount of fishes is weighed for about 6g and is been homogenized with 3.0 mL of  $0.1 \text{ mol L}^{-1}$  EDTA and merged with 2.0 mL in pH 7.0 Mclavine buffer solution by utilizing HY-4 homogenizer model instrument with a lateral speed of 5000 rpm for nearly 30 mins. Afterwards it is shaken vigorously for almost 10 mins with 3 m mL of acetonitrile. Continuing, it is centrifuged at a speed of 5000 rpm for 10 mins, transferred to a clean polypropylene tube. Moreover, using 3.0 mL of aliquot acetonitrile fish residues were extracted. Later, both the extracts are combined further evaporated by drying in nitrogen atmosphere. Obtained dried extract is re-formed in  $200 \mu\text{L}$  of methanol, centrifuged in 5000 rpm for 5 mins and then stored for further use in  $40\text{C}$  dark area.

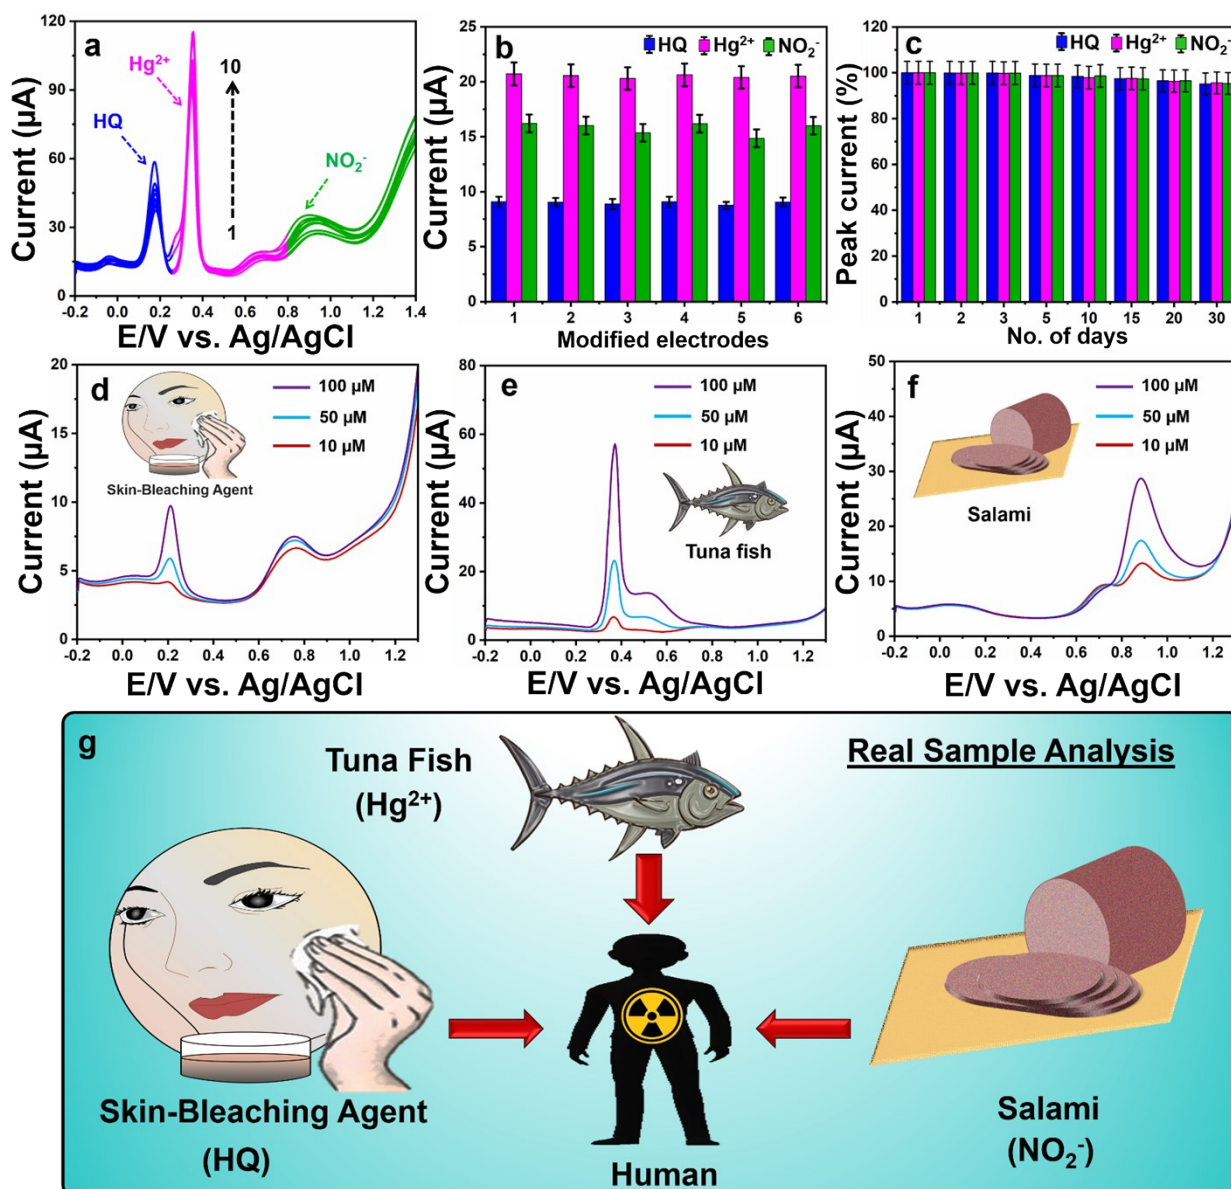

**Fig. S6.** (a) DPV profiles of selectivity of the MnMoO<sub>4</sub> modified GCE containing simultaneous addition HQ Hg<sup>2+</sup> and NO<sub>2</sub><sup>-</sup> in the presence of an excess concentration (1–9) of CC, RC, Cd<sup>2+</sup>, Pb<sup>2+</sup>, NaAc, ascorbic acid, NaCl, bisphenol A, and glucose. (b and c) Reproducibility and stability of the MnMoO<sub>4</sub> modified GCE in 0.05 M pH 7.0. DPV profiles of different real samples of the MnMoO<sub>4</sub> modified GCE containing (d) HQ, (e) Hg<sup>2+</sup> and (f) NO<sub>2</sub><sup>-</sup>. (g) Schematic representation of real-time analysis of analytes causing metabolic toxication.

**Table S1.** Structural, BET and BJH parameters of MgMoO<sub>4</sub>, Fe<sub>2</sub>(MoO<sub>4</sub>)<sub>3</sub> and MnMoO<sub>4</sub>.

| Sample                                           | Lattice parameters (Å) |             |             |              | Scherrer method<br>D (nm) | Lattice strain | Surface area (m <sup>2</sup> /g) | Pore volume (cc/g) | Pore diameter (nm) |
|--------------------------------------------------|------------------------|-------------|-------------|--------------|---------------------------|----------------|----------------------------------|--------------------|--------------------|
|                                                  | a                      | b           | c           | β            |                           |                |                                  |                    |                    |
| MgMoO <sub>4</sub>                               | 10.15                  | 9.24        | 7.03        | 105.9        | 27.55                     | 0.0102         | 21.05                            | 0.078              | 8.91               |
| Fe <sub>2</sub> (MoO <sub>4</sub> ) <sub>3</sub> | 15.70                  | 9.23        | 18.2        | 125.2        | 22.95                     | 0.0122         | 45.24                            | 0.046              | 6.19               |
| MnMoO <sub>4</sub>                               | <b>10.46</b>           | <b>9.51</b> | <b>7.14</b> | <b>106.2</b> | <b>13.45</b>              | <b>0.0105</b>  | <b>90.08</b>                     | <b>0.019</b>       | <b>2.88</b>        |

**Table S2.** Comparison of analytical confines for the determination of HQ at MnMoO<sub>4</sub> BC modified electrode with previous reports.

| Electrode materials                                             | Methods          | Linear range (μM) | LOD (μM)     | Interfering species                                   | Ref              |
|-----------------------------------------------------------------|------------------|-------------------|--------------|-------------------------------------------------------|------------------|
| PANI/MnO <sub>2</sub>                                           | DPV              | 0.2–100           | 0.13         | CC and RC                                             | S1               |
| CD <sup>a</sup> /r-GO                                           | DPV              | 0.5–1000          | 0.17         | CC and RC                                             | S2               |
| AuNPs/Fe <sub>3</sub> O <sub>4</sub> -<br><sup>b</sup> APTES-GO | Amperometric i-t | 3–137             | 1.1          | CC                                                    | S3               |
| GR <sup>c</sup> -La(OH) <sub>3</sub>                            | DPV              | 5–300             | 0.015        | CC                                                    | S4               |
| Pt–Au–<br><sup>d</sup> OSi@CS                                   | Amperometric i-t | 0.06–90.98        | 0.02         | CC                                                    | S5               |
| Graphene–<br>chitosan                                           | DPV              | 1.0–200           | 0.75         | CC                                                    | S6               |
| NA-COGH <sup>e</sup>                                            | DPV              | 0.8–500           | 0.034        | CC                                                    | S7               |
| Polydopamine-<br>RGO                                            | DPV              | 1.0–2300          | 0.074        | CC                                                    | S8               |
| P-rGO                                                           | DPV              | 5-120             | 0.18         | CC                                                    | S9               |
| GMC                                                             | DPV              | 2-70              | 0.31         | CC                                                    | S10              |
| Nitrogen-<br>doped CNT                                          | DPV              | 20–1000           | 2.71         | CC                                                    | S11              |
| <b>MnMoO<sub>4</sub> BC</b>                                     | <b>DPV</b>       | <b>0.9-591.2</b>  | <b>0.026</b> | <b>Hg<sup>2+</sup> and NO<sub>2</sub><sup>-</sup></b> | <b>This work</b> |

*a-* Carbon dot, *b-* (3-Aminopropyl) triethoxysilane, *c-* Graphene, *d-* Organosilica@chitosan composites, *e-* Nanopore array derived cysteine oxide/gold hybrids.

**Table S3.** Comparison of analytical limitations for the determination of Hg<sup>2+</sup> at MnMoO<sub>4</sub> BC modified electrode with previous reports.



| Electrode Materials                                 | Methods            | Linear Range        | LOD            | Interfering Species                                        | Ref.             |
|-----------------------------------------------------|--------------------|---------------------|----------------|------------------------------------------------------------|------------------|
| Pd <sub>1.5</sub> / <sup>a</sup> PAC-900            | DPV                | 0.24–7.5 μM         | 0.054 μM       | Cd <sup>2+</sup> , Pb <sup>2+</sup> , and Cu <sup>2+</sup> | S12              |
| <sup>b</sup> NH <sub>2</sub> -CMS                   | SWASV <sup>c</sup> | 0.4–1.2 μM          | 0.098 μM       | Cd <sup>2+</sup> , Pb <sup>2+</sup> , and Cu <sup>2+</sup> | S13              |
| DNA Modified Fe <sub>3</sub> O <sub>4</sub> @Au NPs | SWV                | 10–100 nM           | 1.7 nM         | Ag <sup>+</sup>                                            | S14              |
| SnO <sub>2</sub> /RGO                               | SWASV              | 0.4–1.2 μM          | 0.279 nM       | Cd <sup>2+</sup> , Pb <sup>2+</sup> , and Cu <sup>2+</sup> | S15              |
| NG <sup>d</sup>                                     | DPSV <sup>e</sup>  | 0.2–9 μM            | 0.05 μM        | Cd <sup>2+</sup> , Pb <sup>2+</sup> , and Cu <sup>2+</sup> | S16              |
| MnFe <sub>2</sub> O <sub>4</sub> NAs <sup>f</sup>   | DPV                | 100 nM–872.3 μM     | 0.14 nM        | -                                                          | S17              |
| <sup>g</sup> Alk-Ti <sub>3</sub> C <sub>2</sub>     | SWASV              | 0.1–1.5 μM          | 0.130          | Cd <sup>2+</sup> , Pb <sup>2+</sup> , and Cu <sup>2+</sup> | S18              |
| <b>MnMoO<sub>4</sub> BC</b>                         | <b>DPV</b>         | <b>0.9-591.2 μM</b> | <b>0.05 μM</b> | <b>HQ and NO<sub>2</sub><sup>-</sup></b>                   | <b>This work</b> |

*a- Porous activated carbons, b- Amino-functionalized carbon microsphere, c- Square wave anodic stripping voltammetry, d- N-doped graphene e- Differential pulse stripping voltammetry, f- Nano-agglomerates g- Alkaline intercalation of Ti<sub>3</sub>C<sub>2</sub> MXene*

**Table S4.** Comparison of analytical limitations for the determination of NO<sub>2</sub><sup>-</sup> at MnMoO<sub>4</sub> BC modified electrode with previous reports.

| Electrode Materials          | Methods                    | Linear Range        | LOD (μM)    | Interfering Species           | Ref.             |
|------------------------------|----------------------------|---------------------|-------------|-------------------------------|------------------|
| La-MWCNTs                    | Chronoamperometry          | 0.4–710 μM          | 0.13        | AA, DA and UA                 | S19              |
| HOOC-MWCNT                   | DPV                        | 100 μM to 0.7 mM    | 0.56        | SO <sub>3</sub> <sup>2-</sup> | S20              |
| Cu/MWCNT/RGO                 | SWV                        | 0.1–75 μM           | 0.03        | NO <sub>3</sub> <sup>-</sup>  | S21              |
| AgZEGE <sup>a</sup>          | CV                         | 100–1000 μM         | 0.005       | NO <sub>3</sub> <sup>-</sup>  | S22              |
| G-PLA <sup>b</sup>           | Multiple-pulse amperometry | 0.5–250 μM          | 0.03        | Uric Acid                     | S23              |
| NRCu <sup>c</sup> /rGO       | DPV                        | 0.3–131.5 μM        | 0.1         | HQ, CC and RS                 | S24              |
| <sup>d</sup> 2,4-DDMA-NiO/NP | SWVs                       | 10.0–700.0 μM       | 5.0         | TS and 4-CPe                  | S25              |
| <b>MnMoO<sub>4</sub> BC</b>  | <b>DPV</b>                 | <b>0.9-453.1 μM</b> | <b>0.01</b> | <b>HQ and Hg<sup>2+</sup></b> | <b>This work</b> |

*a- Zeolite-expanded graphite-epoxy composite electrode, b-Polylactic acid containing graphene, c- Nanoraspberry-like copper, d- 2,4-dimethyl-N'-[1-(2,3- dihydroxyphenyl)methylidene]aniline, e- Thiosulfate and 4-chlorophenol*

**Table S5.** Results of determination of HQ, Hg<sup>2+</sup> and NO<sub>2</sub><sup>-</sup> in face cream, tuna fish, and salami samples towards MnMoO<sub>4</sub> BC/GCE.

| Samples           | Added* ( $\mu\text{M}$ ) | Detected ( $\mu\text{M}$ ) <sup>a</sup><br>HPLC | Detection Rate (%)<br>(Mean $\pm$ RSD) (n=3) |
|-------------------|--------------------------|-------------------------------------------------|----------------------------------------------|
| <b>Face cream</b> | 0                        | -                                               | -                                            |
|                   | 10                       | 09.86                                           | 98.60 $\pm$ 0.017                            |
|                   | 50                       | 49.90                                           | 99.80 $\pm$ 0.011                            |
|                   | 100                      | 99.70                                           | 99.70 $\pm$ 0.005                            |
| <b>Tuna fish</b>  | 0                        | -                                               | -                                            |
|                   | 10                       | 09.73                                           | 97.30 $\pm$ 0.014                            |
|                   | 50                       | 49.50                                           | 99.00 $\pm$ 0.008                            |
|                   | 100                      | 99.17                                           | 99.17 $\pm$ 0.019                            |
| <b>Salami</b>     | 0                        | -                                               | -                                            |
|                   | 10                       | 09.82                                           | 98.20 $\pm$ 0.012                            |
|                   | 50                       | 49.27                                           | 98.54 $\pm$ 0.018                            |
|                   | 100                      | 99.16                                           | 99.16 $\pm$ 0.017                            |

<sup>a</sup>Standard addition method. Relative standard deviation deduced from three separate measurements.

## References:

1. M. A. Prathap, B. Satpati and R. Srivastava, *Sens. Actuators, B*, 2013, **186**, 67-77.
2. W. Zhang, J. Zheng, Z. Lin, L. Zhong, J. Shi, C. Wei, H. Zhang, A. Hao and S. Hu, *Analytical Methods*, 2015, **7**, 6089-6094.
3. S. Eroglu, S. Z. Bas, M. Ozmen and S. Yildiz, *Electrochim. Acta*, 2015, **186**, 302-313.
4. Z. Guo, Y. Lu, J. Li, X.-f. Xu, G.-q. Huang and Z.-y. Wang, *Analytical Methods*, 2014, **6**, 8314-8320.
5. D. Yuan, S. Chen, F. Hu, C. Wang and R. Yuan, *Sens. Actuators, B*, 2012, **168**, 193-199.

6. H. Yin, Q. Zhang, Y. Zhou, Q. Ma, L. Zhu and S. Ai, *Electrochim. Acta*, 2011, **56**, 2748-2753.
7. W. Liu, C. Li, L. Tang, A. Tong, Y. Gu, R. Cai, L. Zhang and Z. Zhang, *Electrochim. Acta*, 2013, **88**, 15-23.
8. H. Zhou, T. Huang, D. Chen, S. Li, H. Yu, Y. Li and Q. Song, *Sens. Actuators, B*, 2017, **249**, 405-413.
9. H. Zhang, X. Bo and L. Guo, *Sens. Actuators, B*, 2015, **220**, 919-926.
10. X. Yuan, D. Yuan, F. Zeng, W. Zou, F. Tzorbatzoglou, P. Tsiakaras and Y. Wang, *Appl. Catal*, 2013, **129**, 367-374.
11. M. Amiri, S. Ghaffari, A. Bezaatpour and F. Marken, *Sens. Actuators, B*, 2012, **162**, 194-200.
12. P. Veerakumar, V. Veeramani, S.-M. Chen, R. Madhu and S.-B. Liu, *ACS Appl. Mater. Interfaces*, 2016, **8**, 1319-1326.
13. Y.-F. Sun, L.-J. Zhao, T.-J. Jiang, S.-S. Li, M. Yang and X.-J. Huang, *Journal of J. Electroanal. Chem*, 2016, **760**, 143-150.
14. P. Miao, Y. Tang and L. Wang, *ACS Appl. Mater. Interfaces*, 2017, **9**, 3940-3947.
15. H. T. Ratte, *Environ. Toxicol. Chem*, 1999, **18**, 89-108.
16. J. Liu, S. Fu, B. Yuan, Y. Li and Z. Deng, *J. Electroanal. Chem*, 2010, **132**, 7279-7281.
17. S. Kogularasu, M. Akilarasan, S.-M. Chen, E. Elaiyappillai, P. M. Johnson, T.-W. Chen, F. M. Al-Hemaid, M. A. Ali and M. S. Elshikh, *Electrochim. Acta*, 2018, **290**, 533-543.
18. X. Zhu, B. Liu, H. Hou, Z. Huang, K. M. Zeinu, L. Huang, X. Yuan, D. Guo, J. Hu and J. Yang, *Electrochim. Acta*, 2017, **248**, 46-57.
19. W. Zhang, R. Yuan, Y.-Q. Chai, Y. Zhang and S.-H. Chen, *Sens. Actuators, B*, 2012, **166**, 601-607.
20. V. Sudha, S. M. S. Kumar and R. Thangamuthu, *J. Alloys Compd*, 2018, **749**, 990-999.
21. H. Bagheri, A. Hajian, M. Rezaei and A. Shirzadmehr, *J. Hazard. Mater.*, 2017, **324**, 762-772.
22. F. Manea, A. Remes, C. Radovan, R. Pode, S. Picken and J. Schoonman, *Talanta*, 2010, **83**, 66-71.

23. R. M. Cardoso, P. R. Silva, A. P. Lima, D. P. Rocha, T. C. Oliveira, T. M. do Prado, E. L. Fava, O. Fatibello-Filho, E. M. Richter and R. A. Muñoz, *Sens. Actuators, B*, 2020, **307**, 127621.
24. N. Sabbaghi and M. Noroozifar, *Anal. Chim. Acta*, 2019, **1056**, 16-25.
25. Z. Keivani, M. Shabani-Nooshabadi and H. Karimi-Maleh,. *J. Colloid Interf. Sci*, 2017, **507**, 11-17.
